# Supplementary material
Source: Springer Nature journal article supplement (https://www.springermedizin.de/resource/supplementary/12943_2013_1521_MOESM10_ESM.pdf/9552440)

**A**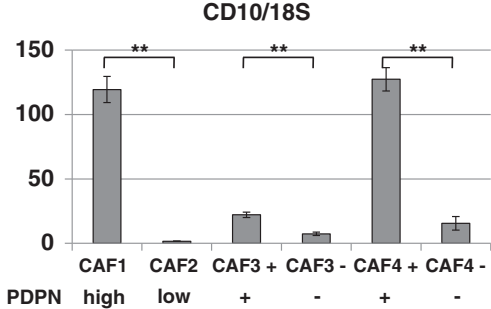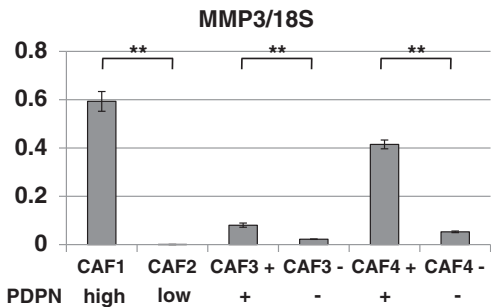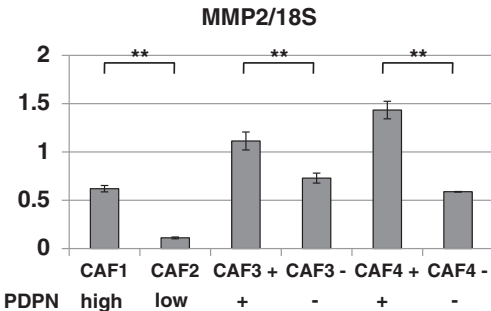

(\*\*P&lt;0.01)

**B**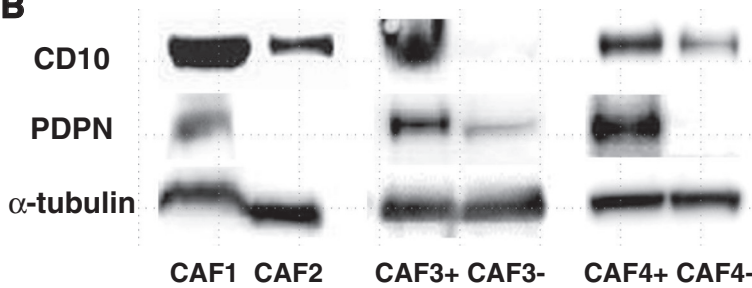

Supplement: MOESM10 [file 9552440]
